# Supplementary material for: Ru(III) Complexes with Lonidamine-Modified Ligands
Source: MDPI journal article supplement (doi:10.3390/ijms222413468), 2021-12-15
Supplement: s1 [file s1]

**Control**  
Bright light

**Control**  
Green light

**Compound 20**  
Bright light

**Compound 20**  
Green light

**Compound 20**  
Merge

**Compound 20**

Clc1ccc(Cl)cc1CNc2c3ccccc3n(C(=O)NCCCCCCCCCCCCCCCCCCCc4ccncc4C(C)(C)C(C)(Cl)Cl)C2=CC=CC=C2

**Figure S2.** Complex **20** in caspase activation fluorescent kit CellEvent™ Caspase-3/7 Green ReadyProbes.

**Table S1.** Inhibition of TrxR1 in rat liver extracts.

| DTNB, mM | TrxR1 IC <sub>50</sub> , $\mu$ M (95% C.I.) |           |
|----------|---------------------------------------------|-----------|
|          | 16                                          | 20        |
| 2.5      | 33 (19–56)                                  | 15 (6–36) |
| 0.1      | 33 (18–60)                                  | 15 (4–44) |
| 0.06     | 24 (8–69)                                   | 17 (8–27) |
